# Supplementary material for: Case-based formalization and reasoning method for knowledge in digital terrain analysis – Illustrated by determining the catchment area threshold for extracting drainage networks
Source: Copernicus journal article supplement (doi:10.5194/hess-2015-539), 2016-01-19
Supplement: Supplementary file [file hess-2015-539-RC2-supplement.pdf]

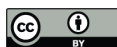

1 **Case-based formalization and reasoning method for**  
2 **knowledge in digital terrain analysis — Illustrated by**  
3 **determining the catchment area threshold for extracting**  
4 **drainage networks**

5  
6 **C.-Z. Qin<sup>1,2,\*</sup> X.-W. Wu<sup>1,3</sup> J.-C. Jiang<sup>4</sup> A.-X. Zhu<sup>1,2,5,6</sup>**

7 [1]{State Key Laboratory of Resources and Environmental Information System, Institute of  
8 Geographic Sciences and Natural Resources Research, CAS, Beijing 100101, China}

9 [2]{Jiangsu Center for Collaborative Innovation in Geographical Information Resource  
10 Development and Application, Nanjing 210023, China}

11 [3] {College of Resources and Environment, University of Chinese Academy of Sciences,  
12 Beijing 100049, China}

13 [4] {Smart City Research Center, Hangzhou Dianzi University, Hangzhou, 310012, China}

14 [5] {Department of Geography, University of Wisconsin-Madison, Madison, WI 53706, USA}

15 [6] {Key Laboratory of Virtual Geographic Environment, Ministry of Education, Nanjing  
16 210023, China}

17 \*Correspondence to: C.-Z. Qin (qincz@lreis.ac.cn)

18

19 **Abstract**

20 Application of digital terrain analysis (DTA), which is typically a modeling process involving  
21 workflow building, relies heavily on DTA domain knowledge of the match between the  
22 algorithm (and its parameter settings) and the application context (including the target task,  
23 the terrain in the study area, the DEM resolution, etc.), which is referred to as application-  
24 context knowledge. However, existing DTA-assisted tools often cannot use application-  
25 context knowledge because this type of DTA knowledge has not been formalized to be  
26 available for inference in these tools. This situation makes the DTA workflow-building  
27 process difficult for users, especially non-expert users. This paper proposes a case-based

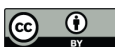

1 formalization for DTA application-context knowledge and a corresponding case-based  
2 reasoning method. A case in this context consists of a series of indices that formalize the DTA  
3 application-context knowledge and the corresponding similarity calculation methods for case-  
4 based reasoning. A preliminary experiment to determine the catchment area threshold for  
5 extracting drainage networks has been conducted to evaluate the performance of the proposed  
6 method. In the experiment, 124 cases of drainage network extraction (50 for evaluation and  
7 74 for reasoning) were prepared from peer-reviewed journal articles. Preliminary evaluation  
8 results **show** that the proposed case-based method is a suitable way to use DTA application-  
9 context knowledge to achieve a marked reduction in the modeling burden for users.

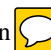

10

## 11 **1 Introduction**

12 Digital terrain analysis (DTA) is a useful approach because it can handle the complexity of  
13 GIS spatial analysis and has been widely used in geography and related fields (Wilson, 2012).  
14 More and more users, including many with little knowledge of DTA, are becoming involved  
15 in DTA applications. Use of DTA is typically a non-trivial workflow-building process  
16 consisting of organizing the various DTA tasks and specifying the algorithm (including  
17 parameter settings) for each task (Hengl and Reuter, 2009). This workflow-building process  
18 relies heavily on knowledge of the match between DTA algorithm specifications and the  
19 particular application context. However, current DTA-assisted tools (e.g., ArcGIS, GRASS,  
20 SAGA, White Box, TauDEM, etc.) provide very limited support during the DTA application  
21 modeling process (Qin et al., 2011). It is therefore difficult for users, especially those with  
22 little knowledge of DTA, to use DTA correctly and effectively.

23 Knowledge used during DTA workflow building can be classified into three types (Qin et al.,  
24 2011): 1) task knowledge, which describes the relationship between DTA tasks and their  
25 input/output; 2) algorithm knowledge, which is the meta-data of a DTA algorithm (including  
26 its parameters); and 3) the so-called application-context knowledge consisting of how to  
27 specify the suitable algorithm and its parameter settings for a DTA task according to the  
28 application context (such as application goals, study area characteristics, and DEM resolution)  
29 (Qin et al., 2013). This knowledge is called application-matching knowledge in Lu et al.  
30 (2012).

31 Among the three types of DTA knowledge, both task knowledge and algorithm knowledge  
32 have been formalized by means of rule or semantic networks (Russell and Norvig, 2009) and

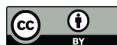

1 hence can be used in existing DTA-assisted tools (e.g., ModelBuilder in ArcGIS). However,  
2 application-context knowledge, which is crucial for building a suitable DTA model for a  
3 specific application, is more difficult for a user to acquire than the other two types of  
4 knowledge. Currently, there is no well-established formalization method by which DTA tools  
5 can provide more effective assistance to DTA applications. This situation exists mainly  
6 because this type of DTA knowledge is largely inaccurate and non-systematic, and often  
7 exists only in documents for specific case studies (DTA application instances) or even just in  
8 the experience of domain experts.

9 To solve this problem, this paper proposes a case-based formalization for DTA case studies  
10 involving DTA application-context knowledge and a corresponding case-based reasoning  
11 method. A DTA-assisted tool can then use this type of knowledge to reduce the difficulty of  
12 DTA application modeling.

13

## 14 **2 Basic idea**

15 Cases are a commonly used way of formalizing non-systematic knowledge in artificial  
16 intelligence. A case is a record of an existing problem-solving instance and its contextual  
17 information, which has two requisite parts: the problem and the solution (Kaster et al., 2005).  
18 The problem describes the application purpose of the case and its contextual information. The  
19 solution is a set of methods (including their parameter settings) for achieving this purpose.  
20 Note that the case is not the same as the concept of a prototype (Minda and Smith, 2001),  
21 which can also use existing instances to describe empirical knowledge and has been applied in  
22 the geographical domain (e.g., Qi et al., 2006; Qin et al., 2009). The prototype highlights the  
23 representativeness of the instances, whereas the case does not. Currently, most DTA  
24 application-context knowledge is empirical knowledge that often exists in application  
25 instances and is difficult to formalize in as explicit rules or mathematical equations. In this  
26 situation, the case is a suitable way to formalize DTA application-context knowledge (Lu et  
27 al., 2012).

28 Case-based reasoning (CBR) (Schank, 1983) is a method of solving problems by referring the  
29 solution of a new problem to the solutions of existing similar cases (Aamodt et al., 1994;  
30 Watson and Marir, 1994). Compared with traditional rule-based knowledge representation  
31 and reasoning methods, the case-based method can simplify knowledge acquisition into case  
32 acquisition, with no need for an explicit expression model of domain knowledge (Watson and



1 Marir, 1994). Therefore, the case-based method is suitable for application domains that lack a  
2 systematic expression of empirical domain knowledge. A case-based reasoning method could  
3 be designed to use DTA application cases to reduce the difficulty of DTA application  
4 modeling for users.

5

### 6 **3 Methodology**

7 According to the basic idea presented above, a case-based formalization methodology is  
8 designed for DTA application instances containing application-context knowledge and the  
9 corresponding inferences (Fig. 1). Case formalization and the corresponding case-based  
10 reasoning method are the two main stages in the methodology.

#### 11 **3.1 Case formalization**

12 Case formalization is the process of extracting and describing each individual case in a formal  
13 way, so that the case can be retrieved by a corresponding case-based reasoning method.  
14 Among the parts of a case, the case problem consists of a set of factors describing the  
15 contextual information associated with the case. This set of factors is quantified using a set of  
16 quantitative attributes that are directly involved in case-based reasoning. It is of crucial  
17 importance to design and quantify these factors properly for case-based reasoning. The  
18 solution part of a case, which records the candidate problem-solving result of the case-based  
19 reasoning, is not necessary to participate in the reasoning procedure. The case output is an  
20 optional part of the description that is used to record the status of factors describing the case  
21 problem after the case occurred (Kolodner, 1993). Therefore, the key to designing a case-based  
22 formalization of DTA application-context knowledge is how to choose and quantify a set of  
23 factors influencing DTA algorithm selection and parameter setting to describe the case  
24 problem appropriately.

25 According to the characteristics of DTA application modeling, the case problem can be  
26 described based on three groups of factors that influence DTA algorithm selection and  
27 parameter setting (Table 1): application purpose, data characteristics, and study area  
28 characteristics. For example, a single flow-direction algorithm (e.g., the classic D8 algorithm)  
29 is suitable for deriving flow accumulation from a SRTM DEM (with a resolution of 90 m) for  
30 drainage network extraction in high-relief areas, whereas a multiple flow-direction algorithm  
31 should be used with a 10-m DEM created from a contour map for estimating detailed spatial



1 distribution of flow accumulation and other related regional topographic attributes (such as  
2 topographic wetness index) in a low-relief area. In this example, the choice between a single  
3 flow-direction algorithm and a multiple flow-direction algorithm is influenced by the  
4 application purpose (i.e., the DTA task of drainage network extraction or deriving the spatial  
5 distribution of regional topographic attributes), data characteristics (i.e., a SRTM DEM with  
6 90-m resolution or a contour-originated DEM with fine resolution), and study area  
7 characteristics (mainly terrain condition, e.g., high or low relief). This example shows the  
8 typical content of application-context knowledge in DTA application modeling.

9 Among these three groups of factors, the application purpose can be formalized by an  
10 enumeration-type variable. Data characteristics can be mainly described by the spatial  
11 resolution of the DEM, the type of data source, etc. In particular, the spatial resolution, which  
12 is often indicated by the grid cell size for the widely used grid-based DTA, is the most  
13 important factor among the data characteristics. The group of factors describing the study area  
14 characteristics related to DTA application-context knowledge could include location, area,  
15 terrain condition, and other environmental conditions (such as climate, geology, etc.).  
16 Generally, terrain condition in a study area comprehensively reflects the influence of all  
17 geographical processes on the landforms in the area. This means that terrain condition might  
18 be one of the most important factors influencing the DTA algorithm selection and parameter  
19 settings. Because of its comprehensiveness, the terrain condition factor should be quantified  
20 by multiple attributes during case-based formalization of DTA application-context knowledge.  
21 Different designs of the quantitative attributes will result in different case-based methods.

22 In a case-based formalization of DTA application-context knowledge, the solution part of a  
23 case can be formalized by recording the name of the DTA algorithm and the corresponding  
24 parameter values used in this case, which is much simpler than describing the case problem.

25 The optional output part of the case-based formalization does not currently need to be  
26 considered for the DTA domain because normally there is no change in the application  
27 context of a DTA application case when the DTA model is applied.

### 28 **3.2 Case-based reasoning method**

29 Case-based reasoning is based on the principle that solutions for similar problems are often  
30 similar, even identical. Therefore, a new DTA application problem can be formalized in the  
31 same way as the case problem part in a prepared DTA case base and then be used in case-



1 based reasoning by calculating the similarity between this new application problem and the  
2 problem part of each case in the case base. The solution of the case with the highest similarity  
3 is reused for the new DTA application problem. Note that in the conceptual framework of a  
4 case-based reasoning method, the solution of the retrieved case with the highest similarity  
5 might be further revised to adapt to the new application problem when the final solution for  
6 the new application problem is retained in the case base (Watson and Marir, 1994). However,  
7 the method developed in this preliminary study currently considers neither the revision nor  
8 the retention process.

9 Calculating the similarity between a new DTA application problem in case format and the  
10 problem part of each case in the DTA case base consists of the following two steps:

11 Step 1. Calculate the similarity of each individual attribute between the new application  
12 problem and the problem description of an existing case. As usual the range of the similarity  
13 value is [0, 1]; the larger the value, the more similar are the two cases. As mentioned above,  
14 the attributes used to formalize the problem part of a DTA application case may have different  
15 value types, such as enumeration type (e.g., application purpose), single-value type (e.g.,  
16 spatial resolution and area), or even a frequency distribution (e.g., hypsometric curve). For  
17 each attribute, a similarity function should be designed correspondingly to quantify the  
18 deviation on this attribute between the new application problem and an existing case. The  
19 design is generated in an empirical way and should match the domain knowledge.

20 Step 2. Synthesize the similarity values for every individual attribute to calculate the overall  
21 similarity between the new application problem and the problem description of an existing  
22 case. In the geographical domain, a minimum operator based on the limiting factor principle  
23 is often used to synthesize similarity values on multiple attributes (Qin et al., 2009).

24

#### 25 **4 Design of a detailed method**

26 In this section, the methodology presented in the previous section is concretized by designing  
27 a detailed case-based formalization method for DTA application instances containing  
28 application-context knowledge and the corresponding inferences. The key issue in method  
29 design is designing a set of quantitative attributes describing the case problem and the  
30 similarity function on each individual attribute. Because the gridded DEM is widely used in

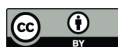

1 practical applications, this method is designed mainly for grid-based DTA, although the  
2 methodology is available for both grid- and vector-based DTA.

### 3 **4.1 Selection of attributes**

4 The set of quantitative attributes should be designed to effectively reflect the contextual  
5 information related to DTA application modeling, and be fit for the case-based reasoning to  
6 follow. The purpose of a DTA application case is naturally described by an enumeration-type  
7 attribute, i.e., the name of the target task. Here, cell size has been chosen as the attribute to  
8 quantify the data characteristics of a DTA application case; other potential factors (such as  
9 type of data source) for describing data characteristics are not currently considered.

10 To describe the study area characteristics of a DTA application case, the area and the terrain  
11 condition of the case are considered in the current method. Like cell size, area is an attribute  
12 with a single numeric value. Terrain condition is an important and comprehensive factor  
13 indicating the difference in study area characteristics between a new DTA application  
14 problem and an existing case.

15 In this study, the three following aspects were designed to describe the terrain condition factor  
16 empirically:

17 1) Relief. The relief attribute is a commonly used value to describe the overall terrain  
18 condition of a study area, whether it is steep or gently sloping.

19 2) Slope distribution. The slope distribution provides information on the proportions of  
20 different intensities of local relief in the area, which cannot be described by the relief in the  
21 overall area and is useful for judging the reasonableness of a DTA algorithm selection and its  
22 parameter settings. To describe in detail the slope distribution in a study area, we quantified it  
23 by a relief-slope frequency distribution. For this purpose, the slope gradient was divided into  
24 seven grades:  $0^{\circ}$ – $3^{\circ}$ ,  $3^{\circ}$ – $8^{\circ}$ ,  $8^{\circ}$ – $15^{\circ}$ ,  $15^{\circ}$ – $25^{\circ}$ ,  $25^{\circ}$ – $35^{\circ}$ ,  $35^{\circ}$ – $45^{\circ}$ , and  $45^{\circ}$ – $90^{\circ}$  (Tang et al.,  
25 2006). The relief of the study area was classified into one of ten levels with equal step. The  
26 relief-slope frequency distribution obtained in this way is a two-dimensional table with 10  
27 level  $\times$  7 grade data items. Considering the influence of DEM resolution on the slope gradient  
28 calculation (Chang et al., 1991; Grohmann, 2015), a relief-slope cumulative frequency  
29 distribution were used here instead of the relief-slope frequency distribution to provide a  
30 quantitative description that relieves the DEM resolution effect. The relief-slope cumulative  
31 frequency in each relief level is calculated by accumulating the number of cells within each



1 slope gradient grade from low to high grade in this relief level. Note that the 10-level division  
2 of elevation considers only the relative relationship among the elevation levels inside the  
3 study area. The elevation level might consist of a distinct elevation step for a study area, in  
4 which case the relief of the study area would be ignored for this attribute. This proposed  
5 design appears to be not only a convenient way to automate similarity calculations in case-  
6 based reasoning, but also reasonable because the relief attribute reflects the relief information  
7 throughout the study area.

8 3) Landscape development stage for the study area, which can provide information on the  
9 geomorphic processes (mainly hydrological erosion process) affecting terrain conditions in a  
10 study area (often a watershed). This information is useful for judging the reasonableness of a  
11 choice of DTA algorithm and its parameter settings related to hydrological and erosion  
12 processes. In this study, the hypsometric curve (Strahler, 1952), which is normally used to  
13 analyze the landscape development stage of river basins, was used as an attribute to describe  
14 this aspect.

15

16 In the proposed method, location is not used as a study area characteristics. This decision was  
17 made because the influence of the study area location in DTA application-context knowledge  
18 could be reflected by the terrain condition of the study area, which directly impacts the choice  
19 of DTA algorithm and parameter settings and has already been considered in the method. For  
20 similar reasons and for the sake of brevity, in the proposed method, environmental conditions  
21 other than terrain condition are not considered.

22 Table 2 lists the attributes used to formalize a case problem in this method.

## 23 **4.2 Similarity function on each individual attribute**

24 The design of the similarity function for an individual attribute should be compatible with the  
25 value type of the attribute and in accord with domain knowledge regarding the level of  
26 similarity due to the difference in the attribute value between the new application problem and  
27 an existing case. For an attribute of the enumeration type, its similarity value between a new  
28 application problem and an existing case can be calculated by a Boolean function (Fig. 2a).  
29 When the attribute values are matched, the similarity value is 1, otherwise it is 0.





1 For an attribute of the single numeric value type, two commonly used kinds of basic similarity  
2 function are considered in this study: the linear function and the bell-shaped function (Fig. 2).  
3 Both kinds of similarity function accord with common sense in that the similarity is 1 for the  
4 minimum difference (i.e., zero) of attribute value, and the greater the difference in attribute  
5 value, the lower is the similarity. With the linear function, the similarity value is set to 0 or 1  
6 when the absolute difference of the attribute between a new application problem and an  
7 existing case reaches its maximum or minimum value. The similarity can be calculated for  
8 other difference values by linear interpolation (Fig. 2b). The similarity function based on a  
9 linear function fits the specification that the maximum difference in attribute values can be  
10 preset.

11 With the bell-shaped function, the maximum difference in attribute values is not easy to  
12 preset and does not need to be. A simplified version of the commonly used bell-shaped  
13 function (Shi et al., 2005; Qin et al., 2009; Fig. 2c) is:

$$14 \quad S = e^{(v_{new} - v_{case}/w)^{0.5} \ln(0.5)}. \quad (1)$$

15 where  $S$  is the similarity between a new application problem and an existing case;  
16  $v_{new}$  and  $v_{case}$  are attribute values of the new application problem and the existing case  
17 respectively; and  $w$  is the shape-adjusting parameter of the function. When the difference  
18 between  $v_{new}$  and  $v_{case}$  is equal to  $w$ , the similarity  $S = 0.5$  (Fig. 2). Some sort of numerical  
19 transformation on the attribute value could be necessary for the similarity calculation to yield  
20 a reasonable reflection of the similarity level due to differences in the attribute.

21 For an attribute of more complex type (such as a frequency distribution), a quantitative index  
22 should be designed to quantify the difference in an attribute between a new application  
23 problem and an existing case. Then the similarity on this attribute can be calculated based on  
24 this index, similarly to the single numeric-value type.

25 Based on these kinds of basic similarity function, similarity functions for each individual  
26 attribute used for case-based reasoning in this paper were designed as shown in Table 2. The  
27 following discussion introduces them one by one.

#### 28 **4.2.1 Name of target task**

29 The name of the target task is an attribute of the enumeration type. The similarity value for  
30 this attribute between a new application problem and an existing case can be calculated by a



1 Boolean function. When the names of two target tasks match, the similarity value is 1,  
2 otherwise it is 0.

### 3 **4.2.2 Cell size**

4 Note that the difference in magnitude of cell size can better reflect the level of similarity  
5 between DTA applications than the numerical difference in cell size. The greater the  
6 difference in magnitude, the lower is the similarity. According to this knowledge, a base-10  
7 logarithmic transformation was applied to the cell size during the similarity calculations.  
8 Because it is not easy to preset the maximum of the attribute value after logarithmic  
9 transformation, the bell-shaped function based on Eq. (1) was used to calculate similarity for  
10 cell size. Furthermore,  $w$  in Eq. (1) is set to 0.5, which means that the similarity in cell size  
11 between a new application problem and an existing case will decrease to 0.5 when their  
12 difference in cell size reaches one order of magnitude (e.g., 1 m vs. 10 m, or vice versa). The  
13 similarity function used in the proposed method for cell size is shown in Table 2.

### 14 **4.2.3 Area**

15 Like cell size, area is also an attribute of the single numeric value type. The greater the  
16 difference in magnitude between two areas, the lower is their similarity on area. Similarly to  
17 the design for the cell size attribute, a base-10 logarithmic transformation is applied to the  
18 area attribute and then the similarity function for this attribute is designed based on the bell-  
19 shaped function. The  $w$  in Eq. (1) has been set to 1.5 for the area attribute by trial and error  
20 (see Table 2).

### 21 **4.2.4 Relief**

22 The greater the difference in relief value between a new application problem and an existing  
23 case, the lower is the similarity. The maximum difference in relief values between two DTA  
24 application areas can be preset due to the geometric nature of the Earth. Hence, the similarity  
25 function for the relief attribute was designed as a linear function using the absolute difference  
26 between the relief of the new DTA application problem and that of existing case.  
27 Corresponding to a zero similarity value, the maximum difference between two relief values  
28 is the larger of the relief differences between the new application problem values and each of  
29 two extreme cases (a flat area with zero relief, and an area with relief from the 8848 m of



1 Mount Everest to sea level). The similarity function used in this method for the relief attribute  
2 is shown in Table 2.

### 3 **4.2.5 Relief-slope cumulative frequency distribution (describing the** 4 **slope distribution)**

5 The relief-slope cumulative frequency distribution is a two-dimensional table with 10 level ×  
6 7 grade data items. This two-dimensional table can be viewed as a DEM having a volume  
7 with a constant projected area. The greater the overlap in volume between the distribution of a  
8 new application problem and that of an existing case, the higher is the similarity. Therefore,  
9 the similarity function for the relief-slope cumulative frequency distribution was designed as  
10 the ratio of the intersection volume to the union volume between two distributions (Table 2).

### 11 **4.2.6 Hypsometric curve (describing the landscape development stage)**

12 The hypsometric curve is often summarized as a single numeric value, the hypsometric  
13 integral (HI, with a value range of [0,1]), which can be used to classify landscape  
14 development into three stages: youth ( $HI > 0.6$ ), maturity ( $0.35 < HI < 0.6$ ), and old age ( $HI <$   
15  $0.35$ ) (Strahler, 1952). The HI was used to design a similarity function for the hypsometric  
16 curve between a new application problem and an existing case, which is a linear function  
17 using the absolute difference of their HI values. When the absolute difference in HI is 0, the  
18 corresponding similarity is 1. The similarity is 0 for the maximum possible deviation from the  
19 HI of the new application problem (see Table 2).

20

21 The overall similarity between a new application problem and an existing case is calculated as  
22 the minimum of all similarity values for every individual attribute between the new  
23 application problem and the existing case.

24

## 25 **5 Experiment**

### 26 **5.1 Experimental design**

27 The extraction of a drainage network, one of the most important DTA applications, was taken  
28 as an example to evaluate the proposed method. The general workflow of river network  
29 extraction based on a gridded DEM includes the following three DTA tasks in sequence: 1)



1 preparing a DEM by filling in the artificial pits and removing absolutely flat areas; 2) using a  
2 flow direction algorithm to derive the spatial distribution of the catchment area (CA); and 3)  
3 setting a CA threshold to extract the drainage network from the spatial distribution of the CA.

4 In this DTA workflow, proper selection of the DTA algorithms (such as the DEM preparation  
5 algorithm and the flow direction algorithm) and of parameter values (e.g., the CA threshold)  
6 is based on DTA application-context matching knowledge. In many geographical information  
7 systems (such as ArcGIS), the DTA algorithm used for drainage network extraction has often  
8 been set to a default selection (e.g., the D8 algorithm as the default flow direction algorithm)  
9 in such a way that the user cannot choose the DTA algorithm. The CA threshold is an  
10 empirical parameter which varies with the study area characteristics and affects the extraction  
11 results directly. Current DTA-related tools often leave the choice of CA threshold for  
12 drainage network extraction to the user. However, it is difficult for users, especially non-  
13 expert users, to determine the appropriate threshold for their applications.

14 Therefore, this experiment was designed to focus on using the proposed method to determine  
15 the CA threshold for drainage network extraction. This means that the cases used in this  
16 experiment have the same name as the target task, i.e., drainage network extraction. The core  
17 of the solution part of the cases is the parameter value, i.e., the CA threshold. Although this  
18 experiment is somewhat simplified, we believe that it can evaluate the proposed method as  
19 effectively as an experiment with a more complex design.

### 20 **5.1.1 Preparation of a case base**

21 The case base prepared for this experiment includes 124 cases of drainage network extraction  
22 (Fig. 3). Each case originated from an article related to the target task that was recently  
23 published in mainstream journals of related domains (such as Water Resources Research,  
24 Hydrology and Earth System Sciences, Hydrological Processes, Computers & Geosciences,  
25 Advances in Water Resources; see the Appendix document for the list of the articles used for  
26 cases). **These articles are supposed to provide good solutions for their specific study areas  
27 based on experts' experience and knowledge of the target task.**

28 Each case was manually prepared from a journal article. The main work involved in preparing  
29 the case problem was extracting each attribute of the study area, whereas the work involved in  
30 preparing the case solution consisted of extracting the CA threshold used in the article.  
31 Normally, the cell size used is clearly stated in the article and can be filled in as the

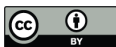

1 corresponding case attribute. However, this is often not true for other attributes. Therefore, an  
2 automatic program was applied to a free DEM dataset of the study area (mainly an SRTM  
3 DEM with a resolution of 90 m and an ASTER GDEM with a resolution of 30 m) to derive  
4 the other attributes (such as area, relief, relief-slope cumulative frequency distribution, and  
5 hypsometric curve) for each case. For the solution part of each case, the CA threshold given  
6 explicitly in each article was recorded directly. If the CA threshold was shown only implicitly  
7 in the drainage network figure in an article, it was determined based on visual comparison  
8 between the drainage network given in the article and those extracted from the DEMs used to  
9 prepare other attributes of this case, using trial and error.

### 10 5.1.2 Evaluation method

11 Among the 124 cases in the case base, 50 cases randomly selected were used as independent  
12 evaluation cases, which were assumed to be new application problems without a solution and  
13 were solved by the reasoning method proposed. The other 74 cases were set aside as the case  
14 base to be used by the proposed case-based reasoning method.

15 To perform a quantitative evaluation of the results from the proposed method on the 50  
16 evaluation cases, an index was used, specifically the relative error of river density ( $E$ ):

$$17 \quad E = \frac{|RiverDensity^{origin} - RiverDensity^{reason}|}{RiverDensity^{origin}}. \quad (2)$$

18 where  $RiverDensity^{origin}$  and  $RiverDensity^{reason}$  are the river density values of a new  
19 application problem (i.e., an evaluation case), obtained respectively from the original CA  
20 threshold and the CA threshold solution obtained from the 74-case base by the proposed  
21 reasoning method.  $E$  is the relative error in river density for the evaluation case. The smaller  
22 the value of  $E$ , the more reasonable is the result obtained for the evaluation case using the  
23 proposed method. Four levels of  $E$  were established empirically to reflect the reasonableness  
24 level: reasonable ( $E \in [0, 0.1]$ ), acceptable ( $E \in (0.1, 0.25]$ ), questionable ( $E \in (0.25, 0.5]$ ), and  
25 unreasonable ( $E \in (0.5, +\infty)$ ). Representative cases were also selected to discuss the  
26 reasonableness of its similarity result obtained using the proposed method. The relationship  
27 between  $E$  and the similarity value of the solution case to the evaluation case was also  
28 analyzed to discuss the performance of the proposed method.



## 1 5.2 Experimental results and discussion

2 Table 3 lists the results of 50 evaluation cases solved by the proposed method using the case  
3 base presented in the previous section. The similarities between every evaluation case and its  
4 most similar case as reasoned by the proposed method were found in this experiment to lie  
5 within a value range from 0.47 to 0.9. The higher the similarity, the lower is the uncertainty of  
6 the result from the proposed method.

7 According to the relative error of river density ( $E$ ), the counts of evaluation cases with  
8 reasonable, acceptable, questionable, and unreasonable results are 26, 16, 3, and 5  
9 respectively (Table 3). This shows that the proposed method performs satisfactorily. Taking  
10 the results on two evaluation cases, Godavari [1053] (the “[1053]” means that the original CA  
11 threshold recorded in the Godavari case was 1053 km<sup>2</sup>) and Burdekin [502] (“[502]” defined  
12 similarly) as examples, their most similar cases in the case base as reasoned by the proposed  
13 method were KrishnaRiver [908.08] and MahanadiRiver [891] respectively. The CA  
14 threshold values from the solution of the most similar cases (908.08 km<sup>2</sup> and 891 km<sup>2</sup>) were  
15 applied respectively to the Godavari and Burdekin evaluation cases. The extracted drainage  
16 networks are with close spatial distribution as those extracted with the original CA thresholds  
17 of the evaluation cases (Fig. 4). Their values of relative error of river density are 0.07  
18 (reasonable level) and 0.24 (acceptable level) respectively.

19 The evaluation results with questionable and unreasonable levels also have lower similarities.  
20 This means that there is no case in the current case base that has an application context highly  
21 similar to that of the evaluation case. Hence, the solution from the proposed method has  
22 higher uncertainty and might lead to questionable or even unreasonable application results for  
23 new application problems. Taking the result for the YbbsRiver [1.01] evaluation case ( $E=0.4$ ;  
24 questionable) as an example, the similarities between this evaluation case and other cases in  
25 the case base depend mostly on the similarities on the cell size attribute during the case-based  
26 reasoning process proposed in this paper (Table 4). Because the cell size of the YbbsRiver  
27 case is 10 m, which is relatively unlike cell size (30 m or 90 m) of most other cases in the case  
28 base, the overall similarities between this evaluation case and these cases in the case base are  
29 mainly limited by the individual similarity on cell size when synthesizing the similarities on  
30 individual attributes by the proposed method. Furthermore, Table 4 shows that the CA  
31 threshold values of the cases with the top 10 highest similarity values to the YbbsRiver  
32 evaluation case would make the  $E$  value of the application result for the evaluation case



1 questionable or even unreasonable ( $E$ : 0.33–21.73). The solution selected by the proposed  
2 method achieved a relatively better application result.

3 As for the reasoning results on the Kasilian [0.08] evaluation case ( $E=0.63$ ; unreasonable)  
4 using the proposed method, no individual attribute has a controlling effect on the overall  
5 similarity between the Kasilian evaluation case and the other cases in the case base (Table 5).  
6 The CA threshold values of the cases with the top 10 highest similarity values to the Kasilian  
7 evaluation case would almost always lead to an unreasonable  $E$  value of the application result  
8 for the evaluation case ( $E$ : 0.48–0.92). The similarities between this evaluation case and the  
9 cases in the case base are lower (Table 5). This problem could be mitigated by extending the  
10 case base to contain cases with more combinations of data characteristics and study area  
11 characteristics.

12 The distribution of the similarity results of the evaluation cases from the proposed method  
13 among the reasonableness levels of the drainage network results using the solved CA  
14 thresholds was also analyzed (Table 6). All solution cases with higher similarity (above 0.7)  
15 to the evaluation cases produced reasonable and acceptable drainage network results, whereas  
16 solution cases with lower similarity (below 0.7) often produced the questionable and  
17 unreasonable drainage network results. This shows the effectiveness with which similarity  
18 reflects uncertainty in the proposed method.

19

## 20 **6 Summary**

21 Although DTA application-context knowledge is of key importance in building an appropriate  
22 DTA application, currently this type of knowledge has not been formalized to be available for  
23 DTA-assisted tools to relieve the modeling burden of DTA users (especially non-expert users).  
24 This paper has proposed a case-based methodology for formalizing DTA application-context  
25 knowledge and corresponding case-based reasoning. A detailed method based on this  
26 methodology has been developed. Taking drainage network extraction from a gridded DEM  
27 as an application example, 124 cases (50 for evaluation and 74 for reasoning) of drainage  
28 network extraction from peer-reviewed journal articles were used to evaluate the performance  
29 of the proposed method. Preliminary evaluation results show the reasonableness of the  
30 proposed case-based method.



1 Additional research is needed to enhance the proposed method. Currently the proposed  
2 methodology is implemented as a primary method in this paper. The design for the individual  
3 attributes and their quantification in each case could be improved to describe the application-  
4 context knowledge in a more adaptive way for various DTA application targets. Another  
5 possible improvement to the method would be to revise the solution part of the case as  
6 suggested by case-based reasoning before applying the solution to the new application  
7 problem. The possibility of synthesizing the solutions of the cases in the base with higher  
8 similarity to build a solution to the new application problem could be also explored.

9 Automatic or semi-automatic methods of creating cases are needed to speed up the expansion  
10 of the case base (not only for the current target task, but also for other DTA application tasks).  
11 An expanded case base containing as many cases as possible with more combinations of all  
12 kinds of characteristics would improve the application effectiveness of the proposed method.  
13 The size of the case base also matters when evaluating the effectiveness of the case-based  
14 reasoning method and its successive versions. However, current cases used in the experiment  
15 were mainly manually prepared from journal articles, except for certain attribute calculations  
16 (e.g., relief, hypsometric curve), for which an automatic computer program was used. This  
17 inefficient way of preparing cases needs to be improved through automatic or semi-automatic  
18 case-extraction methods.

19

## 20 **Acknowledgements**

21 This study was supported by the National Natural Science Foundation of China (No.  
22 41422109, 41431177), and the National Science & Technology Pillar Program of China (No.  
23 2013BAC08B03-4).

24

## 25 **References**

- 26 Aamodt, A. and Plaza, E.: Case-based reasoning: foundational issues, methodological  
27 variations, and system approaches, *AI Commun.*, 7, 39-59, 1994.
- 28 Chang, K. and Tsai, B.: The effect of DEM resolution on slope and aspect mapping, *Cartogr.*  
29 *Geogr. Inf. Syst.*, 18, 69-77, 1991.



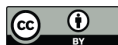

- 1 Grohmann, C. H.: Effects of spatial resolution on slope and aspect derivation for regional-  
2 scale analysis, *Comput. Geosci.*, 77, 111-117, 2015.
- 3 Hengl, T. and Reuter, H. I.: *Geomorphometry: Concepts, Software, Applications*, Elsevier,  
4 Amsterdam, 2009.
- 5 Kaster, D. S., Medeiros, C. B., and Rocha, H. V.: Supporting modeling and problem solving  
6 from precedent experiences: the role of workflows and case-based reasoning, *Environ. Modell.*  
7 *Softw.*, 20, 689-704, 2005.
- 8 Kolodner, J.: *Case-based Reasoning*, Morgan Kaufmann Publishers, San Mateo, 1993.
- 9 Lu, Y., Qin, C. Z., Zhu, A. X., and Qiu, W. L.: Application-matching knowledge based  
10 engine for a modelling environment for digital terrain analysis, in: *GeoInformatics*, The  
11 Chinese University of Hong Kong, China, 15-17 June 2012.
- 12 Minda, J. P. and Smith, J. D.: Prototypes in category learning: The effects of category size,  
13 category structure, and stimulus complexity, *J. Exp. Psychol. Learn. Mem. Cogn.*, 27, 775-  
14 799, 2001.
- 15 Qi, F., Zhu, A-X., Harrower, M., and Burt, J. E.: Fuzzy soil mapping based on prototype  
16 category theory, *Geoderma*, 136, 774-787, 2006.
- 17 Qin, C.-Z., Zhu, A-X., Shi, X., Li, B.-L., Pei, T., and Zhou, C.-H.: Quantification of spatial  
18 gradation of slope positions, *Geomorphology*, 110, 152-161, 2009.
- 19 Qin, C.-Z., Lu, Y.-J., Zhu, A-X., and Qiu, W.-L.: Software prototyping of a heuristic and  
20 visualized modeling environment for digital terrain analysis, in: *11th International Conference*  
21 *on GeoComputation*, University College London, UK, 20-22 July 2011.
- 22 Qin, C.-Z., Jiang, J.-C., Zhan, L.-J., Lu, Y.-J., and Zhu, A-X.: A browser/server-based  
23 prototype of heuristic modelling environment for digital terrain analysis, in: *Geomorphometry*,  
24 *Nanjing Normal University*, China, 15-20 October 2013.
- 25 Qin, C.-Z., Wu, X.-W., Lu, Y.-J., Jiang, J.-C., and Zhu, A-X.: Case-based formalization of  
26 knowledge of digital terrain analysis, in: *Geomorphometry for Geosciences (Proceedings of*  
27 *Geomorphometry'2015)*, edited by: Jasiewicz, J., Zwoliński, Zb., Mitsova, H., and Hengl, T.,  
28 Adam Mickiewicz University in Poznań, 209-212, 2015.
- 29 Russell, S. and Norvig, P.: *Artificial Intelligence: a Modern Approach (3rd Edition)*, Prentice  
30 Hall, 2009.



- 1 Schank, R. C.: Dynamic Memory: a Theory of Reminding and Learning in Computers and
- 2 People, Cambridge University Press, New York, USA, 1983.
- 3 Shi, X., Zhu, A-X., and Wang, R.: Fuzzy representation of special terrain features using a
- 4 similarity-based approach, in: Fuzzy Modeling with Spatial Information for Geographic
- 5 Problems, edited by: Petry, F. E., Robinson, V. B., and Cobb, M. A., Springer, Berlin
- 6 Heidelberg, 233-251, 2005.
- 7 Strahler, A. N.: Hypsometric (area-altitude) analysis of erosional topography, Bull. Geol. Soc.
- 8 Am., 63, 1117-1142, 1952.
- 9 Tang, G. A. and Song, J.: Comparison of slope classification methods in slope mapping from
- 10 DEMs, J. Soil Water Conserv., 20, 157-160, 2006.
- 11 Watson, I. and Abdullah, S.: Developing case-based reasoning systems: a case study in
- 12 diagnosing building defects, in: Case Based Reasoning: Prospects for Applications (Digest No.
- 13 1994/057), IEE Colloquium on. IET: 1/1-1/3, 1994.
- 14 Watson, I. and Marir, F.: Case-based reasoning: a review, Knowl. Eng. Rev., 9, 327-354,
- 15 1994.
- 16 Wilson, J. P.: Digital terrain modelling, Geomorphology, 137, 107-121, 2012.
- 17



- 1 Table 1. General composition of DTA application-context knowledge in a case-based  
2 formalization.

| Part of case           | Composition of DTA application-context knowledge                                               |
|------------------------|------------------------------------------------------------------------------------------------|
| Case problem           | Application purpose                                                                            |
|                        | Data characteristics (spatial resolution, data source, etc.)                                   |
|                        | Study area characteristics (location, area, terrain condition, other environmental conditions) |
| Case solution          | DTA algorithm used and its parameter settings                                                  |
| Case output (optional) | (not considered in the current DTA application)                                                |

3

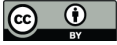

1 Table 2. Attributes used in this study to formalize the case problem and the corresponding  
 2 similarity functions for case-based reasoning using DTA application-context knowledge.

| DTA application context        |                    |                                                                                | Similarity function                                                                           |
|--------------------------------|--------------------|--------------------------------------------------------------------------------|-----------------------------------------------------------------------------------------------|
| Factor group                   | Factor             | Attribute                                                                      |                                                                                               |
| Application purpose            | Target task type   | Name of target task                                                            | Boolean function                                                                              |
| Data characteristics           | Spatial resolution | Cell size (m)                                                                  | $S_i = 2^{-(2 lgR_{new}-lgR_i )^{0.5}}$                                                       |
|                                | Area               | Area (km <sup>2</sup> )                                                        | $S_i = 2^{-( lgArea_{new}-lgArea_i /1.5)^{0.5}}$                                              |
|                                |                    | Relief (m)                                                                     | $S_i = 1 - S_i' / \max(8848 - Relief_{new}, Relief_{new})$ $S_i' =  Relief_{new} - Relief_i $ |
| Characteristic s of study area | Terrain condition  | Relief-slope cumulative frequency distribution (describing slope distribution) | $S_i = \frac{Intersect(RlfSlp_{new}, RlfSlp_i)}{Union(RlfSlp_{new}, RlfSlp_i)}$               |
|                                |                    | Hypsometric curve (quantifying the landscape development stage)                | $S_i = 1 - S_i' / \max(1 - HI_{new}, HI_{new})$ $S_i' =  HI_{new} - HI_i $                    |

3 Note:  $S_i$  is the similarity (value range: [0, 1]) of an individual attribute between a new  
 4 application problem and the  $i$ -th case;  $R_{new}$ ,  $R_i$  are the DEM resolutions (m) of the new  
 5 application problem and the  $i$ -th case respectively;  $Area_{new}$ ,  $Area_i$  are the areas (km<sup>2</sup>) of the  
 6 new application problem and the  $i$ -th case respectively;  $Relief_{new}$ ,  $Relief_i$  are the relief (m)  
 7 of the new application problem and the  $i$ -th case respectively;  $RlfSlp_{new}$ ,  $RlfSlp_i$  are the  
 8 histograms of the relief-slope cumulative frequency distributions of the new application  
 9 problem and the  $i$ -th case respectively; and  $HI_{new}$ ,  $HI_i$  are the hypsometric integrals of the  
 10 new application problem and the  $i$ -th case respectively.

11



1 Table 3. Evaluation results of the proposed method.

| Evaluation case<br>[original CA threshold<br>(km <sup>2</sup> )] | Most similar case<br>[CA threshold (km <sup>2</sup> )] | Similarity | <i>E</i> | Reasonableness<br>level |
|------------------------------------------------------------------|--------------------------------------------------------|------------|----------|-------------------------|
| UpperRhône [81]                                                  | KernRiver [81]                                         | 0.83       | 0        | Reasonable              |
| MicaCreek1 [0.03]                                                | MicaCreek2 [0.03]                                      | 0.85       | 0        |                         |
| WillowRiver [40.5]                                               | Bowron [40.5]                                          | 0.89       | 0        |                         |
| YamzhogYumCo [12.15]                                             | CedoCaka [12.15]                                       | 0.75       | 0        |                         |
| Stanley [0.2]                                                    | Pettit [0.2]                                           | 0.73       | 0        |                         |
| Alturas [0.2]                                                    | Pettit [0.2]                                           | 0.68       | 0        |                         |
| WarregoSC2 [4.42]                                                | WarregoSC4 [4.33]                                      | 0.83       | 0.01     |                         |
| Toachi [3.13]                                                    | SanPabloLaMana<br>[3.07]                               | 0.76       | 0.01     |                         |
| FuRiver [0.009]                                                  | CameronHighlands<br>[0.0093]                           | 0.64       | 0.02     |                         |
| Davidson [0.48]                                                  | UpperMcKenzie [0.5]                                    | 0.59       | 0.02     |                         |
| Komati [36.64]                                                   | Bowron [40.5]                                          | 0.60       | 0.04     |                         |
| UpperTananim [0.52]                                              | Bellever [0.59]                                        | 0.81       | 0.05     |                         |
| Crocodile [36.30]                                                | Bowron [40.5]                                          | 0.74       | 0.05     |                         |
| Cheakamus [8.1]                                                  | LiWuRiver [9]                                          | 0.80       | 0.05     |                         |
| Susquehanna [810]                                                | DoloresR_Cisco<br>[763.17]                             | 0.71       | 0.05     |                         |
| RoubachPlaten [0.32]                                             | HJA [0.27]                                             | 0.80       | 0.06     |                         |
| Godavari [1053]                                                  | KrishnaRiver [908.08]                                  | 0.80       | 0.07     |                         |
| Gard [8.09]                                                      | JuniataRiver [6.98]                                    | 0.69       | 0.07     |                         |
| Urola [5.22]                                                     | OitaRiver [6.48]                                       | 0.79       | 0.07     |                         |
| UpperDalya [0.45]                                                | Bellever [0.59]                                        | 0.82       | 0.08     |                         |
| WarregoSC3 [5.05]                                                | WarregoSC4 [4.33]                                      | 0.77       | 0.08     |                         |
| SanJuanR_Bluff [708.35]                                          | ColoradoR_Cameron<br>[794]                             | 0.87       | 0.08     |                         |
| Monastir [3.47]                                                  | Baba [4.19]                                            | 0.80       | 0.08     |                         |
| SouthPark [24.3]                                                 | CooperRiver [29.34]                                    | 0.78       | 0.09     |                         |
| Rhône [398.97]                                                   | PoRiver [486]                                          | 0.86       | 0.1      |                         |
| Bishop_Hull [0.86]                                               | Brue [0.70]                                            | 0.78       | 0.1      |                         |



|                       |                         |      |      |              |
|-----------------------|-------------------------|------|------|--------------|
| AlzetteEttel [0.23]   | Bellebeek [0.31]        | 0.76 | 0.12 |              |
| PedlerCreek [0.41]    | Bellever [0.59]         | 0.70 | 0.12 |              |
| Fengman [243]         | UpperGuadiana [324]     | 0.66 | 0.14 |              |
| Cauvery [1053]        | ColoradoR_Cameron [794] | 0.77 | 0.15 |              |
| MiddleColorado [5.93] | WarregoSC4 [4.33]       | 0.85 | 0.15 |              |
| LuckyHills [6.3]      | SouthForkNew [2.7]      | 0.71 | 0.15 |              |
| Limpopo [987.22]      | DoloresR_Cisco [763.17] | 0.61 | 0.16 |              |
| LittlePiney [2.84]    | Blackwater [4.35]       | 0.86 | 0.17 | Acceptable   |
| ChiJiaWang [0.34]     | ErhWu [0.23]            | 0.80 | 0.17 |              |
| Hailogou [2.03]       | SanPabloLaMana [3.07]   | 0.68 | 0.18 |              |
| Batchawana [0.75]     | ClearCreek [1.22]       | 0.58 | 0.2  |              |
| Liene [5.37]          | LiWuRiver [9]           | 0.74 | 0.2  |              |
| Zwalm [0.36]          | Haean [0.55]            | 0.73 | 0.2  |              |
| TapajosRiver [2720]   | SaoFrancisco [5160]     | 0.67 | 0.23 |              |
| Burdekin [502]        | MahanadiRiver [891]     | 0.90 | 0.24 |              |
| Garonne [247.68]      | PoRiver [486]           | 0.71 | 0.24 |              |
| NorthEsk [1.22]       | SanPabloLaMana [3.07]   | 0.63 | 0.33 |              |
| YbbsRiver [1.01]      | Davidson [0.48]         | 0.69 | 0.43 | Questionable |
| Cordevole [0.68]      | SouthForkNew [2.7]      | 0.69 | 0.46 |              |
| NarayaniRiver [130]   | Durance [51.21]         | 0.51 | 0.52 |              |
| YaluTsangpo [81.56]   | SalmonRiver [486]       | 0.47 | 0.55 |              |
| Kasilian [0.08]       | Haean [0.55]            | 0.63 | 0.63 | Unreasonable |
| UpstreamGarza [0.2]   | NorsmindeFjord [4.05]   | 0.69 | 0.74 |              |
| Zhanghe [33.11]       | Lonquen [7.29]          | 0.69 | 1.06 |              |



- 1 Table 4. Top 10 similarity values between the YbbsRiver evaluation case and existing cases
- 2 as reasoned by the proposed method.

| Case name      | Similarity value on individual attribute |      |        |                           |                   | Overall similarity | <i>E</i> |
|----------------|------------------------------------------|------|--------|---------------------------|-------------------|--------------------|----------|
|                | Cell size                                | Area | Relief | Relief-slope distribution | Hypsometric curve |                    |          |
| UpperMcKenzie  | 1                                        | 0.73 | 0.90   | 0.62                      | 0.92              | 0.62               | 0.4      |
| XianNanGou     | 0.58                                     | 0.61 | 0.88   | 0.59                      | 0.76              | 0.58               | 21.73    |
| NorsmindeFjord | 0.58                                     | 0.74 | 0.84   | 0.64                      | 0.91              | 0.58               | 0.44     |
| Pettit         | 1                                        | 0.56 | 0.96   | 0.62                      | 0.76              | 0.56               | 1.19     |
| Bellebeek      | 0.54                                     | 0.69 | 0.83   | 0.54                      | 0.81              | 0.54               | 0.73     |
| Haean          | 0.51                                     | 0.65 | 0.94   | 0.78                      | 0.93              | 0.51               | 0.33     |
| MicaCreek2     | 0.51                                     | 0.53 | 0.89   | 0.62                      | 0.75              | 0.51               | 5.23     |
| SouthForkNew   | 0.51                                     | 0.69 | 0.89   | 0.76                      | 0.52              | 0.51               | 0.35     |
| Babaohe        | 0.51                                     | 0.57 | 0.88   | 0.73                      | 0.90              | 0.51               | 0.73     |
| ClintonRiver   | 0.51                                     | 0.59 | 0.85   | 0.56                      | 0.55              | 0.51               | 0.79     |

3



- 1 Table 5. Top 10 similarity values between the Kasilian evaluation case and existing cases as
- 2 reasoned by the proposed method.

| Case name      | Similarity value on individual attribute |      |        |                           |                    | Overall similarity | <i>E</i> |
|----------------|------------------------------------------|------|--------|---------------------------|--------------------|--------------------|----------|
|                | Cell size                                | Area | Relief | Relief-slope distribution | Hypso metric curve |                    |          |
| Haean          | 0.63                                     | 0.92 | 0.83   | 0.83                      | 0.93               | 0.63               | 0.63     |
| SanPabloLaMana | 0.61                                     | 0.61 | 0.74   | 0.60                      | 0.76               | 0.60               | 0.84     |
| Brue           | 0.61                                     | 0.67 | 0.73   | 0.59                      | 0.88               | 0.59               | 0.66     |
| OitaRiver      | 0.61                                     | 0.57 | 0.95   | 0.73                      | 0.96               | 0.57               | 0.91     |
| Baba           | 0.61                                     | 0.55 | 0.98   | 0.83                      | 0.97               | 0.55               | 0.87     |
| JuniataRiver   | 0.63                                     | 0.55 | 0.78   | 0.64                      | 0.86               | 0.55               | 0.92     |
| NorsmindeFjord | 0.54                                     | 0.74 | 0.71   | 0.72                      | 0.95               | 0.54               | 0.87     |
| Lonquen        | 0.61                                     | 0.52 | 0.82   | 0.73                      | 0.93               | 0.52               | 0.92     |
| HJA            | 0.63                                     | 0.90 | 0.86   | 0.51                      | 0.64               | 0.51               | 0.48     |
| Bellever       | 0.61                                     | 0.78 | 0.74   | 0.50                      | 0.68               | 0.50               | 0.63     |

3





1 Table 6. Relationship between  $E$  and the similarity value of the solution case to the evaluation  
2 case.

|                        | $S \in [0.8, 1]$ | $S \in [0.7, 0.8)$ | $S \in [0.6, 0.7)$ | $S \in [0, 0.6)$ |
|------------------------|------------------|--------------------|--------------------|------------------|
| $E \in [0, 0.1]$       | 10               | 11                 | 3                  | 2                |
| $E \in (0.1, 0.25]$    | 3                | 8                  | 4                  | 1                |
| $E \in (0.25, 0.5]$    | 0                | 0                  | 3                  | 0                |
| $E \in (0.5, +\infty)$ | 0                | 0                  | 3                  | 2                |

3

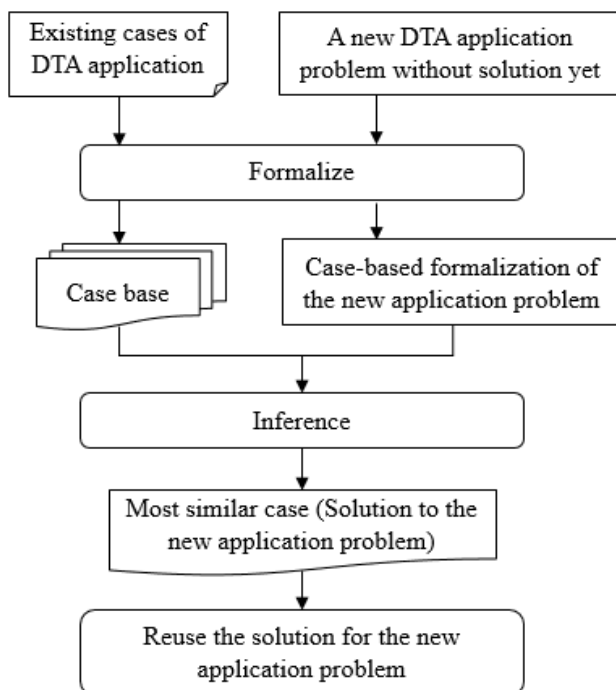

1

2

3 Figure 1. Structure of the case-based formalization and reasoning method for DTA  
4 application-context knowledge.

5

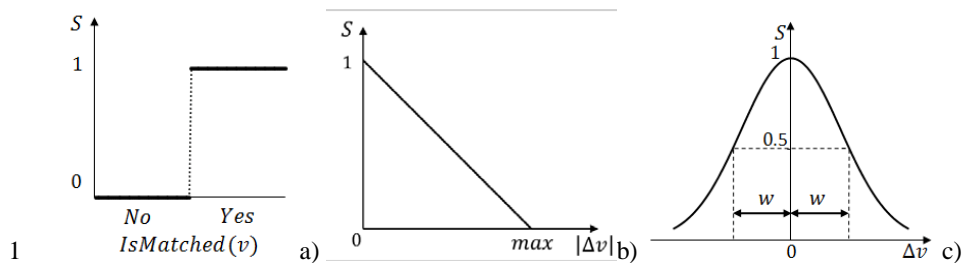

Figure 2. Basic kinds of similarity function: a) Boolean function; b) linear function; c) bell-shaped function.

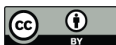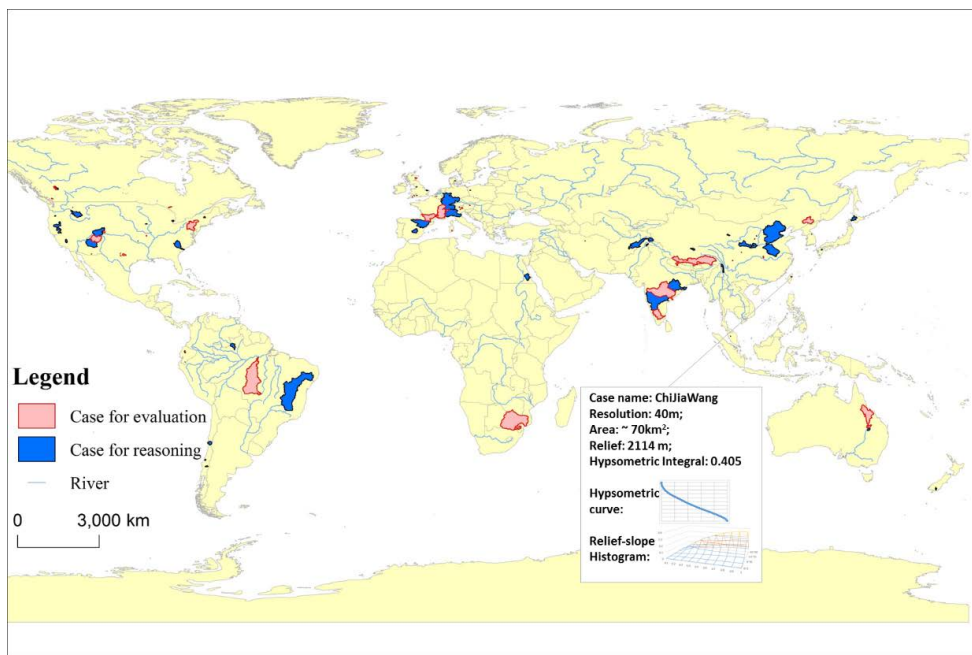

1

2

3 Figure 3. Spatial distribution of the cases used in this study (the box in the map shows an  
4 example of a formalized case).

5

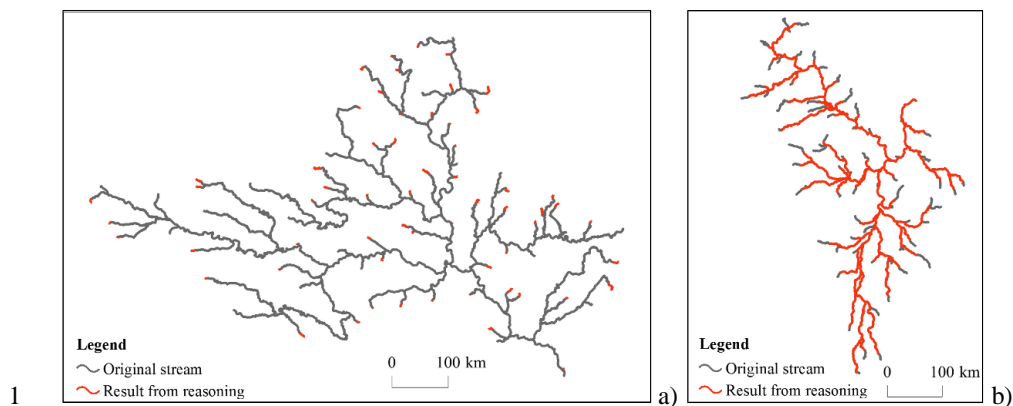

Figure 4. Comparison between the original drainage network of an individual evaluation case and its extraction result using case-based reasoning: a) Godavari; and b) Burdekin.

1 **Appendix. List of cases**

| Case name     | Source paper                                                                                                                                                                                                                                                    |
|---------------|-----------------------------------------------------------------------------------------------------------------------------------------------------------------------------------------------------------------------------------------------------------------|
| LittlePiney   | Botter G. Flow regime shifts in the Little Piney creek (US)[J]. <i>Advances in Water Resources</i> , 2014, 71: 44-54.                                                                                                                                           |
| PoRiver       | Lanzoni S, Luchi R, Pittaluga M B. Modeling the morphodynamic equilibrium of an intermediate reach of the Po River (Italy)[J]. <i>Advances in Water Resources</i> , 2015, 81: 95–102.                                                                           |
| UpperMcKenzie | Di Lazzaro M, Zarlenga A, Volpi E. Hydrological effects of within-catchment heterogeneity of drainage density[J]. <i>Advances in Water Resources</i> , 2015, 76: 157-167.                                                                                       |
| Babaohe       | Lei F, Huang C, Shen H, et al. Improving the estimation of hydrological states in the SWAT model via the ensemble Kalman smoother: Synthetic experiments for the Heihe River Basin in northwest China[J]. <i>Advances in Water Resources</i> , 2014, 67: 32-45. |
| OldMansCreek  | Ayalew T B, Krajewski W F, Mantilla R, et al. Exploring the effects of hillslope-channel link dynamics and excess rainfall properties on the scaling structure of peak-discharge[J]. <i>Advances in Water Resources</i> , 2014, 64: 9-20.                       |
| UpstreamGarza | Balistrocchi M, Grossi G, Bacchi B. Deriving a practical analytical-probabilistic method to size flood routing reservoirs[J]. <i>Advances in Water Resources</i> , 2013, 62: 37-46.                                                                             |
| Peacheater    | Kim J, Warnock A, Ivanov V Y, et al. Coupled modeling of hydrologic and hydrodynamic processes including overland and channel flow[J]. <i>Advances in Water Resources</i> , 2012, 37: 104-126.                                                                  |
| Cauvery       | Konar M, Todd M J, Muneeppeerakul R, et al. Hydrology as a driver of biodiversity: Controls on carrying capacity, niche formation, and dispersal[J]. <i>Advances in Water Resources</i> , 2013, 51: 317-325.                                                    |
| Krishna       |                                                                                                                                                                                                                                                                 |
| Krishna       |                                                                                                                                                                                                                                                                 |
| Godavari      |                                                                                                                                                                                                                                                                 |
| Klodawka      | Jasiewicz J Ł, Metz M. A new GRASS GIS toolkit for Hortonian analysis of drainage networks[J]. <i>Computers &amp; Geosciences</i> , 2011, 37(8): 1162-1173.                                                                                                     |



|                  |                                                                                                                                                                                                                           |
|------------------|---------------------------------------------------------------------------------------------------------------------------------------------------------------------------------------------------------------------------|
| Chabagou         | Li T, Wang G, Chen J. A modified binary tree codification of drainage networks to support complex hydrological models[J]. Computers & Geosciences, 2010, 36(11): 1427-1435.                                               |
| SaoFrancisco     | Saraiva A G S, Paz A R. Multi-step change of scale approach for deriving coarse-resolution flow directions[J]. Computers & Geosciences, 2014, 68: 53-63.                                                                  |
| TapajosRiver     |                                                                                                                                                                                                                           |
| CooperRiver      | Castronova A M, Goodall J L. A hierarchical network-based algorithm for multi-scale watershed delineation[J]. Computers & Geosciences, 2014, 72: 156-166.                                                                 |
| MiddleColorado   | Karimipour F, Ghandehari M, Ledoux H. Watershed delineation from the medial axis of river networks[J]. Computers & Geosciences, 2013, 59: 132-147.                                                                        |
| FuRiver          | Xu C, Xu X, Dai F, et al. Comparison of different models for susceptibility mapping of earthquake triggered landslides related with the 2008 Wenchuan earthquake in China[J]. Computers & Geosciences, 2012, 46: 317-329. |
| JuniataRiver     | Yu X, Bhatt G, Duffy C, et al. Parameterization for distributed watershed modeling using national data and evolutionary algorithm[J]. Computers & Geosciences, 2013, 58: 80-90.                                           |
| YoungWomansCreek |                                                                                                                                                                                                                           |
| YaluTsangpo      | Wang H, Fu X, Wang G. Multi-tree Coding Method (MCM) for drainage networks supporting high-efficient search[J]. Computers & Geosciences, 2013, 52: 300-306.                                                               |
| KaghanValley     | Dehvari A, Heck R J. Removing non-ground points from automated photo-based DEM and evaluation of its accuracy with LiDAR DEM[J]. Computers & Geosciences, 2012, 43: 108-117.                                              |
| CameronHighlands | Lim S L, Sagar B S D, Koo V C, et al. Morphological convexity measures for terrestrial basins derived from digital elevation models[J]. Computers & Geosciences, 2011, 37(9): 1285-1294.                                  |
| W_Kharit         | Milewski A, Sultan M, Yan E, et al. A remote sensing solution for estimating runoff and recharge in arid environments[J]. Journal of Hydrology, 2009, 373(1): 1-14.                                                       |
| ChiJiaWang       | Lin W T, Chou W C, Lin C Y, et al. Automated suitable drainage network extraction from digital elevation models in Taiwan's upstream                                                                                      |
| ErhWu            |                                                                                                                                                                                                                           |



|               |                                                                                                                                                                                                                                                    |
|---------------|----------------------------------------------------------------------------------------------------------------------------------------------------------------------------------------------------------------------------------------------------|
|               | watersheds[J]. Hydrological Processes, 2006, 20(2): 289-306.                                                                                                                                                                                       |
| Demeni        | Getirana A C V, Bonnet M P, Rotunno Filho O C, et al. Improving hydrological information acquisition from DEM processing in floodplains[J]. Hydrological Processes, 2009, 23(3): 502-514.                                                          |
| Batchawana    | Creed I F, Hwang T, Lutz B, et al. Climate warming causes intensification of the hydrological cycle, resulting in changes to the vernal and autumnal windows in a northern temperate forest[J]. Hydrological Processes, 2015, 29: 3519–3534.       |
| Hailogou      | Xing B, Liu Z, Liu G, et al. Determination of runoff components using path analysis and isotopic measurements in a glacier - covered alpine catchment (upper Hailuogou Valley) in southwest China[J]. Hydrological Processes, 2015, 29, 3065–3073. |
| Bellebeek     | Loosvelt L, Pauwels V, Verhoest N E C. On the significance of crop - type information for the simulation of catchment hydrology[J]. Hydrological Processes, 2015, 29(6): 915-926.                                                                  |
| WeiRiver      | Zuo D, Xu Z, Peng D, et al. Simulating spatiotemporal variability of blue and green water resources availability with uncertainty analysis[J]. Hydrological Processes, 2015, 29(8): 1942-1955.                                                     |
| HunzaRiver    | Biber K, Khan S D, Shah M T. The source and fate of sediment and mercury in Hunza River basin, Northern Areas, Pakistan[J]. Hydrological Processes, 2015, 29(4): 579-587.                                                                          |
| Kasilian      | Saghafian B, Meghdadi A R, Sima S. Application of the WEPP model to determine sources of run - off and sediment in a forested watershed[J]. Hydrological Processes, 2015, 29(4): 481-497.                                                          |
| Lonquen       | Stewart R D, Abou Najm M R, Rupp D E, et al. Hillslope run - off thresholds with shrink–swell clay soils[J]. Hydrological Processes, 2015, 29(4): 557-571.                                                                                         |
| MicaCreek1    | Du E, Link T E, Gravelle J A, et al. Validation and sensitivity test of the distributed hydrology soil - vegetation model (DHSVM) in a forested mountain watershed[J]. Hydrological Processes, 2014, 28(26): 6196-6210.                            |
| MicaCreek2    |                                                                                                                                                                                                                                                    |
| NarayaniRiver | Neupane R P, Yao J, White J D. Estimating the effects of climate change on                                                                                                                                                                         |





|              |                                                                                                                                                                                                                                                                                                       |
|--------------|-------------------------------------------------------------------------------------------------------------------------------------------------------------------------------------------------------------------------------------------------------------------------------------------------------|
|              | the intensification of monsoonal - driven stream discharge in a Himalayan watershed[J]. Hydrological Processes, 2014, 28(26): 6236-6250.                                                                                                                                                              |
| WillowRiver  | Zhang M, Wei X. Contrasted hydrological responses to forest harvesting in two large neighbouring watersheds in snow hydrology dominant environment: implications for forest management and future forest hydrology studies[J]. Hydrological Processes, 2014, 28(26): 6183-6195.                       |
| Bowron       |                                                                                                                                                                                                                                                                                                       |
| UpperDalya   | Peleg N, Shamir E, Georgakakos K P, et al. A framework for assessing hydrological regime sensitivity to climate change in a convective rainfall environment: a case study of two medium-sized eastern Mediterranean catchments, Israel[J]. Hydrology and Earth System Sciences, 2015, 19(1): 567-581. |
| UpperTananim |                                                                                                                                                                                                                                                                                                       |
| SanFrancisco | Timbe E, Windhorst D, Crespo P, et al. Understanding uncertainties when inferring mean transit times of water trough tracer-based lumped-parameter models in Andean tropical montane cloud forest catchments[J]. Hydrology and Earth System Sciences, 2014, 18: 1503-1523.                            |
| HuaiRiver    | Chen X, Hao Z, Devineni N, et al. Climate information based streamflow and rainfall forecasts for Huai River basin using hierarchical Bayesian modeling[J]. Hydrology and Earth System Sciences, 2014, 18(4): 1539-1548.                                                                              |
| WarregoSC2   | Alvarez-Garreton C, Ryu D, Western A W, et al. Improving operational flood ensemble prediction by the assimilation of satellite soil moisture: comparison between lumped and semi-distributed schemes[J]. Hydrology and Earth System Sciences, 2015, 19(4): 1659-1676.                                |
| WarregoSC3   |                                                                                                                                                                                                                                                                                                       |
| WarregoSC4   |                                                                                                                                                                                                                                                                                                       |
| Ishikari     | Duan W L, He B, Takara K, et al. Modeling suspended sediment sources and transport in the Ishikari River basin, Japan, using SPARROW[J]. Hydrology and Earth System Sciences, 2015, 19(3): 1293-1306.                                                                                                 |
| Limari       | Scott C A, Vicuña S, Blanco-Gutiérrez I, et al. Irrigation efficiency and water-policy implications for river basin resilience[J]. Hydrology and Earth System Sciences, 2014, 18(4): 1339-1348.                                                                                                       |
| Limpopo      | Trambauer P, Werner M, Winsemius H C, et al. Hydrological drought forecasting and skill assessment for the Limpopo River basin, southern Africa[J]. Hydrology and Earth System Sciences, 2015, 19(4): 1695-1711.                                                                                      |



|             |                                                                                                                                                                                                                                                                                              |
|-------------|----------------------------------------------------------------------------------------------------------------------------------------------------------------------------------------------------------------------------------------------------------------------------------------------|
| Crocodile   | Saraiva Okello A M L, Masih I, Uhlenbrook S, et al. Drivers of spatial and temporal variability of streamflow in the Incomati River basin[J]. Hydrology and Earth System Sciences, 2015, 19(2): 657-673.                                                                                     |
| Komati      |                                                                                                                                                                                                                                                                                              |
| Haean       | Shope C L, Maharjan G R, Tenhunen J, et al. Using the SWAT model to improve process descriptions and define hydrologic partitioning in South Korea[J]. Hydrology and Earth System Sciences, 2014, 18(2): 539-557.                                                                            |
| Durance     | Kuentz A, Mathevet T, Gailhard J, et al. Building long-term and high spatio-temporal resolution precipitation and air temperature reanalyses by mixing local observations and global atmospheric reanalyses: the ANATEM method[J]. Hydrology and Earth System Sciences, 2015, 19: 2717-2736. |
| Kabul       | Wi S, Yang Y C E, Steinschneider S, et al. Calibration approaches for distributed hydrologic models in poorly gaged basins: implication for streamflow projections under climate change[J]. Hydrology and Earth System Sciences, 2015, 19(2): 857-876.                                       |
| Garonne     | Habets F, Philippe E, Martin E, et al. Small farm dams: impact on river flows and sustainability in a context of climate change[J]. Hydrology and Earth System Sciences, 2014, 18(10): 4207-4222.                                                                                            |
| Rhone       |                                                                                                                                                                                                                                                                                              |
| Ebro        | Peñas F J, Barquín J, Snelder T H, et al. The influence of methodological procedures on hydrological classification performance[J]. Hydrology and Earth System Sciences, 2014, 18(9): 3393-3409.                                                                                             |
| Olifants    | Dabrowski J M. Applying SWAT to predict orthophosphate loads and trophic status in four reservoirs in the upper Olifants catchment, South Africa[J]. Hydrology and Earth System Sciences, 2014, 18: 2629-2643.                                                                               |
| WeiRiver    | Zhan C S, Jiang S S, Sun F B, et al. Quantitative contribution of climate change and human activities to runoff changes in the Wei River basin, China[J]. Hydrology and Earth System Sciences, 2014, 18(8): 3069-3077.                                                                       |
| Bellever    | Liu J, Han D. On selection of the optimal data time interval for real-time hydrological forecasting[J]. Hydrology and Earth System Sciences, 2013, 17(9): 3639-3659.                                                                                                                         |
| Brue        |                                                                                                                                                                                                                                                                                              |
| Bishop_Hull |                                                                                                                                                                                                                                                                                              |
| Pomahaka    | McMillan H K, Hreinsson E Ö, Clark M P, et al. Operational hydrological data assimilation with the recursive ensemble Kalman filter[J]. Hydrology and Earth System Sciences, 2013, 17(1): 21-38.                                                                                             |



|                   |                                                                                                                                                                                                                                             |
|-------------------|---------------------------------------------------------------------------------------------------------------------------------------------------------------------------------------------------------------------------------------------|
| ColoradoR_Cameron | Rosenberg E A, Clark E A, Steinemann A C, et al. On the contribution of groundwater storage to interannual streamflow anomalies in the Colorado River basin[J]. Hydrology and Earth System Sciences, 2013, 17(4): 1475-1491.                |
| SanJuanR_Bluff    |                                                                                                                                                                                                                                             |
| DoloresR_Cisco    |                                                                                                                                                                                                                                             |
| RioSanFrancisco   | Windhorst D, Waltz T, Timbe E, et al. Impact of elevation and weather patterns on the isotopic composition of precipitation in a tropical montane rainforest[J]. Hydrology and Earth System Sciences, 2013, 17(1): 409-419.                 |
| RioSanFrancisco   |                                                                                                                                                                                                                                             |
| Rhine             | Vorogushyn S, Merz B. Flood trends along the Rhine: the role of river training[J]. Hydrology and Earth System Sciences, 2013, 17(10): 3871-3884.                                                                                            |
| Urola             | Cowpertwait P, Ocio D, Collazos G, et al. Regionalised spatiotemporal rainfall and temperature models for flood studies in the Basque Country, Spain[J]. Hydrology and Earth System Sciences, 2013, 17: 479-494.                            |
| KrishnaRiver      | Surinaidu L, Bacon C G D, Pavelic P. Agricultural groundwater management in the Upper Bhima Basin, India: current status and future scenarios[J]. Hydrology and Earth System Sciences, 2013, 17(2): 507-517.                                |
| ClearCreek        | Zhang H L, Wang Y J, Wang Y Q, et al. The effect of watershed scale on HEC-HMS calibrated parameters: a case study in the Clear Creek watershed in Iowa, US[J]. Hydrology and Earth System Sciences, 2013, 17(7): 2735-2745.                |
| Baba              | Arias-Hidalgo M, Bhattacharya B, Mynett A E, et al. Experiences in using the TMPA-3B42R satellite data to complement rain gauge measurements in the Ecuadorian coastal foothills[J]. Hydrology and Earth System Sciences, 2013, 17(7): 2905 |
| Toachi            |                                                                                                                                                                                                                                             |
| SanPabloLaMana    |                                                                                                                                                                                                                                             |
| Monastir          | Mascaro G, Piras M, Deidda R, et al. Distributed hydrologic modeling of a sparsely monitored basin in Sardinia, Italy, through hydrometeorological downscaling[J]. Hydrology and Earth System Sciences, 2013, 17(10): 4143-4158.            |
| Gard              | Braud I, Ayrat P A, Bouvier C, et al. Multi-scale hydrometeorological observation and modelling for flash-flood understanding[J]. Hydrology and Earth System Sciences, 2014, 18(9): 3733-3761.                                              |
| Zhanghe           | Xie X, Meng S, Liang S, et al. Improving streamflow predictions at                                                                                                                                                                          |



|                |                                                                                                                                                                                                                                   |
|----------------|-----------------------------------------------------------------------------------------------------------------------------------------------------------------------------------------------------------------------------------|
|                | ungauged locations with real-time updating: application of an EnKF-based state-parameter estimation strategy[J]. Hydrology and Earth System Sciences, 2014, 18(10): 3923                                                          |
| Davidson       | Yang J, Castelli F, Chen Y. Multiobjective sensitivity analysis and optimization of distributed hydrologic model MOBIDIC[J]. Hydrology and Earth System Sciences, 2014, 18(10): 4101-4112.                                        |
| Lienz          | He Z H, Parajka J, Tian F Q, et al. Estimating degree-day factors from MODIS for snowmelt runoff modeling[J]. Hydrology and Earth System Sciences, 2014, 18(12): 4773-4789.                                                       |
| Cheakamus      | Bourdin D R, Nipen T N, Stull R B. Reliable probabilistic forecasts from an ensemble reservoir inflow forecasting system[J]. Water Resources Research, 2014, 50(4): 3108-3130.                                                    |
| YbbsRiver      | Ceola S, Bertuzzo E, Singer G, et al. Hydrologic controls on basin - scale distribution of benthic invertebrates[J]. Water Resources Research, 2014, 50(4): 2903-2920.                                                            |
| Susquehanna    | Giuliani M, Herman J D, Castelletti A, et al. Many - objective reservoir policy identification and refinement to reduce policy inertia and myopia in water management[J]. Water Resources Research, 2014, 50(4): 3355-3377.       |
| NorsmindeFjord | He X, Koch J, Sonnenborg T O, et al. Transition probability - based stochastic geological modeling using airborne geophysical data and borehole data[J]. Water Resources Research, 2014, 50(4): 3147-3169.                        |
| SouthPark      | Ball L B, Caine J S, Ge S. Controls on groundwater flow in a semiarid folded and faulted intermountain basin[J]. Water Resources Research, 2014, 50(8): 6788-6809.                                                                |
| KernRiver      | Giroto M, Cortés G, Margulis S A, et al. Examining spatial and temporal variability in snow water equivalent using a 27 year reanalysis: Kern River watershed, Sierra Nevada[J]. Water Resources Research, 2014, 50(8): 6713-6734 |
| UpperRhone     | Bordoy R, Burlando P. Stochastic downscaling of climate model precipitation outputs in orographically complex regions: 2. Downscaling methodology[J]. Water Resources Research, 2014, 50(1): 562-579.                             |
| Pettit         | Mallard J, McGlynn B, Covino T. Lateral inflows, stream - groundwater                                                                                                                                                             |



|              |                                                                                                                                                                                                                                                               |
|--------------|---------------------------------------------------------------------------------------------------------------------------------------------------------------------------------------------------------------------------------------------------------------|
| Stanley      | exchange, and network geometry influence stream water composition[J].<br>Water Resources Research, 2014, 50(6): 4603-4623.                                                                                                                                    |
| Alturas      |                                                                                                                                                                                                                                                               |
| Burdekin     | Bainbridge Z T, Lewis S E, Smithers S G, et al. Fine - suspended sediment and water budgets for a large, seasonally dry tropical catchment: Burdekin River catchment, Queensland, Australia[J]. Water Resources Research, 2014, 50(11): 9067-9087.            |
| Blackwater   | Cooper R J, Krueger T, Hiscock K M, et al. Sensitivity of fluvial sediment source apportionment to mixing model assumptions: A Bayesian model comparison[J]. Water Resources Research, 2014, 50(11): 9031-9047.                                               |
| OitaRiver    | Higashino M, Stefan H G. Modeling the effect of rainfall intensity on soil - water nutrient exchange in flooded rice paddies and implications for nitrate fertilizer runoff to the Oita River in Japan[J]. Water Resources Research, 2014, 50(11): 8611-8624. |
| Zwalm        | Guingla P, Douglas A, Keyser R, et al. Improving particle filters in rainfall - runoff models: Application of the resample - move step and the ensemble Gaussian particle filter[J]. Water Resources Research, 2013, 49(7): 4005-4021.                        |
| XianNanGou   | Ichoku C, Karnieli A, Verchovsky I. Application of fractal techniques to the comparative evaluation of two methods of extracting channel networks from digital elevation models[J]. Water Resources Research, 1996, 32(2): 389-399.                           |
| Hodder       | Bulygina N, Ballard C, McIntyre N, et al. Integrating different types of information into hydrological model parameter estimation: Application to ungauged catchments and land use scenario analysis[J]. Water Resources Research, 2012, 48(6), W06519.       |
| NorthEsk     | Capell R, Tetzlaff D, Soulsby C. Can time domain and source area tracers reduce uncertainty in rainfall - runoff models in larger heterogeneous catchments?[J]. Water Resources Research, 2012, 48(9), W09544.                                                |
| SouthForkNew | Gu C, Anderson W, Maggi F. Riparian biogeochemical hot moments induced by stream fluctuations[J]. Water Resources Research, 2012, 48(9), W09546.                                                                                                              |



|                |                                                                                                                                                                                                                              |
|----------------|------------------------------------------------------------------------------------------------------------------------------------------------------------------------------------------------------------------------------|
| LiWuRiver      | Huang Jr C, Yu C K, Lee J Y, et al. Linking typhoon tracks and spatial rainfall patterns for improving flood lead time predictions over a mesoscale mountainous watershed[J]. Water Resources Research, 2012, 48(9), W09540. |
| AlzetteEttel   | Krier R, Matgen P, Goergen K, et al. Inferring catchment precipitation by doing hydrology backward: A test in 24 small and mesoscale catchments in Luxembourg[J]. Water Resources Research, 2012, 48(10), W10525.            |
| MessPontpierre |                                                                                                                                                                                                                              |
| Colpach        |                                                                                                                                                                                                                              |
| RoudbachPlaten |                                                                                                                                                                                                                              |
| Burdekin       | Kuhnert P M, Henderson B L, Lewis S E, et al. Quantifying total suspended sediment export from the Burdekin River catchment using the loads regression estimator tool[J]. Water Resources Research, 2012, 48(4), W04533.     |
| Cajon          | Mendoza P A, McPhee J, Vargas X. Uncertainty in flood forecasting: A distributed modeling approach in a sparse data catchment[J]. Water Resources Research, 2012, 48(9), W09532.                                             |
| Tenderfoot     | Payn R A, Gooseff M N, McGlynn B L, et al. Exploring changes in the spatial distribution of stream baseflow generation during a seasonal recession[J]. Water Resources Research, 2012, 48(4), W04519.                        |
| Wattenbach     | Rogger M, Pirkel H, Viglione A, et al. Step changes in the flood frequency curve: Process controls[J]. Water Resources Research, 2012, 48(5), W05544.                                                                        |
| Weerbach       |                                                                                                                                                                                                                              |
| UpperRhone     | Leite Ribeiro M, Blanckaert K, Roy A G, et al. Hydromorphological implications of local tributary widening for river rehabilitation[J]. Water Resources Research, 2012, 48(10), W10528.                                      |
| WhiteRiver     | Steinschneider S, Polebitski A, Brown C, et al. Toward a statistical framework to quantify the uncertainties of hydrologic response under climate change[J]. Water Resources Research, 2012, 48(11), W11525.                 |
| AmericanRiver  | Woldemichael A T, Hossain F, Pielke R, et al. Understanding the impact of dam - triggered land use/land cover change on the modification of extreme precipitation[J]. Water Resources Research, 2012, 48(9), W09547.         |
| MahanadiRiver  | Kannan S, Ghosh S. A nonparametric kernel regression model for                                                                                                                                                               |



|               |                                                                                                                                                                                                                                                           |
|---------------|-----------------------------------------------------------------------------------------------------------------------------------------------------------------------------------------------------------------------------------------------------------|
|               | downscaling multisite daily precipitation in the Mahanadi basin[J]. <i>Water Resources Research</i> , 2013, 49(3): 1360-1385.                                                                                                                             |
| Nujiang       | Kibler K M, Tullos D D. Cumulative biophysical impact of small and large hydropower development in Nu River, China[J]. <i>Water Resources Research</i> , 2013, 49(6): 3104-3118.                                                                          |
| LuckyHills    | Sivandran G, Bras R L. Dynamic root distributions in ecohydrological modeling: A case study at Walnut Gulch Experimental Watershed[J]. <i>Water Resources Research</i> , 2013, 49(6): 3292-3305.                                                          |
| Sacramento    | Ficklin D L, Stewart I T, Maurer E P. Effects of climate change on stream temperature, dissolved oxygen, and sediment concentration in the Sierra Nevada in California[J]. <i>Water Resources Research</i> , 2013, 49(5): 2765-2782.                      |
| Feather       |                                                                                                                                                                                                                                                           |
| ClintonRiver  | Shen C, Niu J, Phanikumar M S. Evaluating controls on coupled hydrologic and vegetation dynamics in a humid continental climate watershed using a subsurface - land surface processes model[J]. <i>Water Resources Research</i> , 2013, 49(5): 2552-2572. |
| HJA           | Garcia E S, Tague C L, Choate J S. Influence of spatial temperature estimation method in ecohydrologic modeling in the Western Oregon Cascades[J]. <i>Water Resources Research</i> , 2013, 49(3): 1611-1624.                                              |
| UpperGuadiana | Loon A F, Lanen H A J. Making the distinction between water scarcity and drought using an observation - modeling framework[J]. <i>Water Resources Research</i> , 2013, 49(3): 1483-1502.                                                                  |
| HaiRiver      | Jia Y, Ding X, Wang H, et al. Attribution of water resources evolution in the highly water - stressed Hai River Basin of China[J]. <i>Water Resources Research</i> , 2012, 48(2), W02513.                                                                 |
| Cordevole     | Rigon E, Comiti F, Lenzi M A. Large wood storage in streams of the Eastern Italian Alps and the relevance of hillslope processes[J]. <i>Water Resources Research</i> , 2012, 48(1), W01518.                                                               |
| SalmonRiver   | Yearsley J. A grid - based approach for simulating stream temperature[J]. <i>Water Resources Research</i> , 2012, 48(3), W03506.                                                                                                                          |
| CedoCaka      | Zhang G, Xie H, Yao T, et al. Snow cover dynamics of four lake basins                                                                                                                                                                                     |



|              |                                                                                                                   |
|--------------|-------------------------------------------------------------------------------------------------------------------|
| YamzhogYumCo | over Tibetan Plateau using time series MODIS data (2001–2010)[J]. Water Resources Research, 2012, 48(10), W10529. |
|--------------|-------------------------------------------------------------------------------------------------------------------|

1
